# Supplementary material for: Construction of a tri-chromatic reporter cell line for the rapid and simple screening of splice-switching oligonucleotides targeting DMD exon 51 using high content screening
Source: PubMed Central journal article supplement (PMC5955590; doi:10.1371/journal.pone.0197373), 2018-05-16

# S2 Fig

Phase contrast

Tag-BFP

EGFP

Tag-RFP

3-mix  
02+20+09  
(total 100 nM)

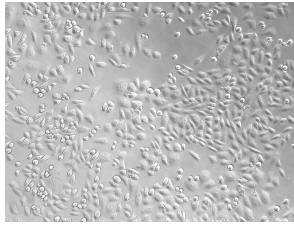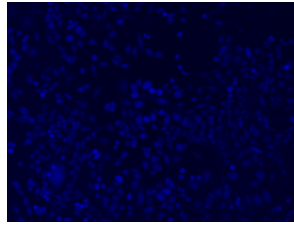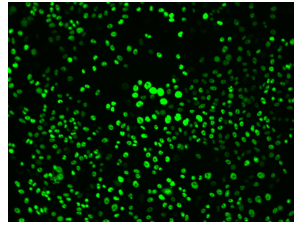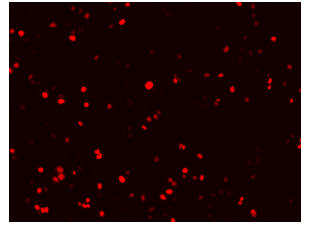

3-mix  
02+20+11  
(total 100 nM)

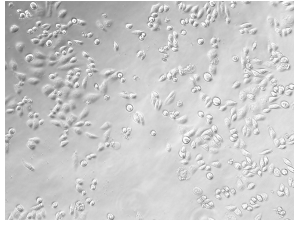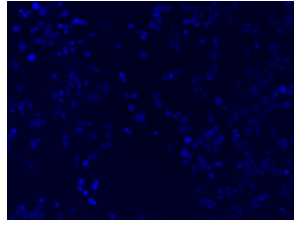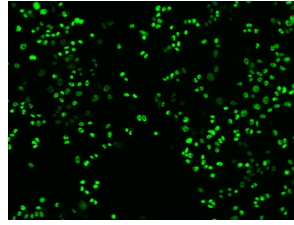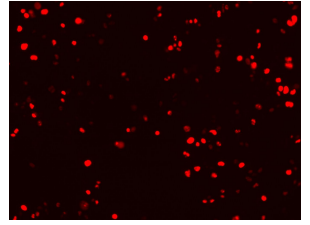

3-mix  
02+20+12  
(total 100 nM)

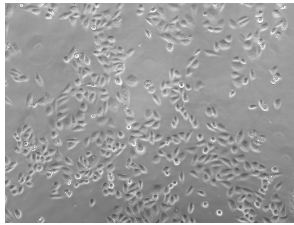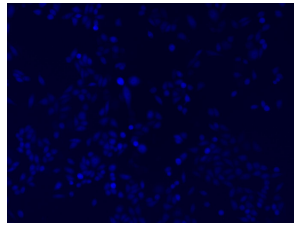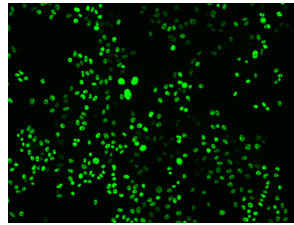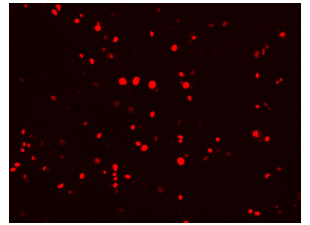

3-mix  
02+20+14  
(total 100 nM)

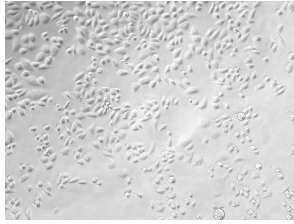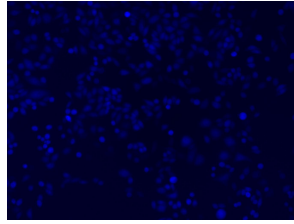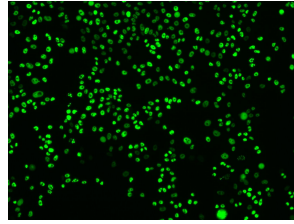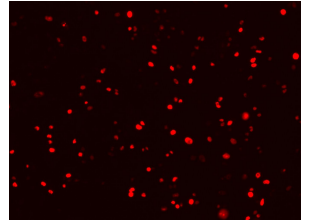

3-mix  
02+20+19  
(total 100 nM)

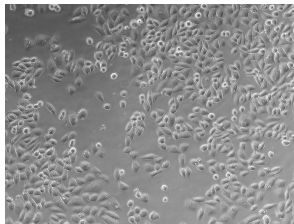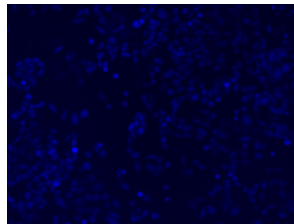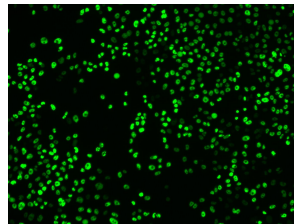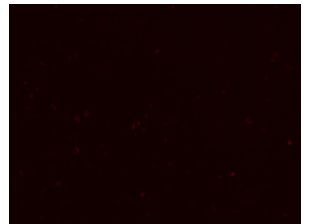

2-mix  
02+20  
(total 100 nM)

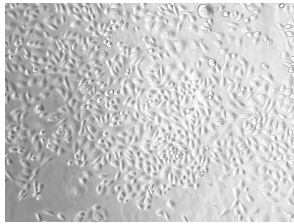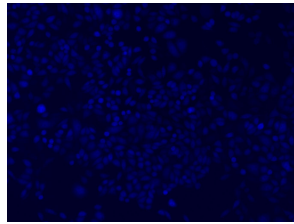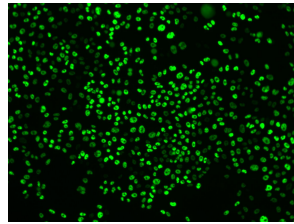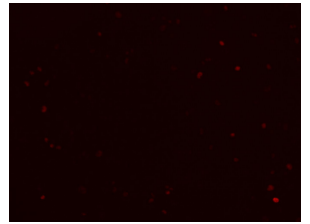

Supplement: pone.0197373.s002.pdf [file pone.0197373.s002.pdf]
