# Supplementary material for: Construction of a tri-chromatic reporter cell line for the rapid and simple screening of splice-switching oligonucleotides targeting DMD exon 51 using high content screening
Source: PubMed Central journal article supplement (PMC5955590; doi:10.1371/journal.pone.0197373), 2018-05-16
Supplement: pone.0197373.s005.pdf [file pone.0197373.s005.pdf]

S5 Fig

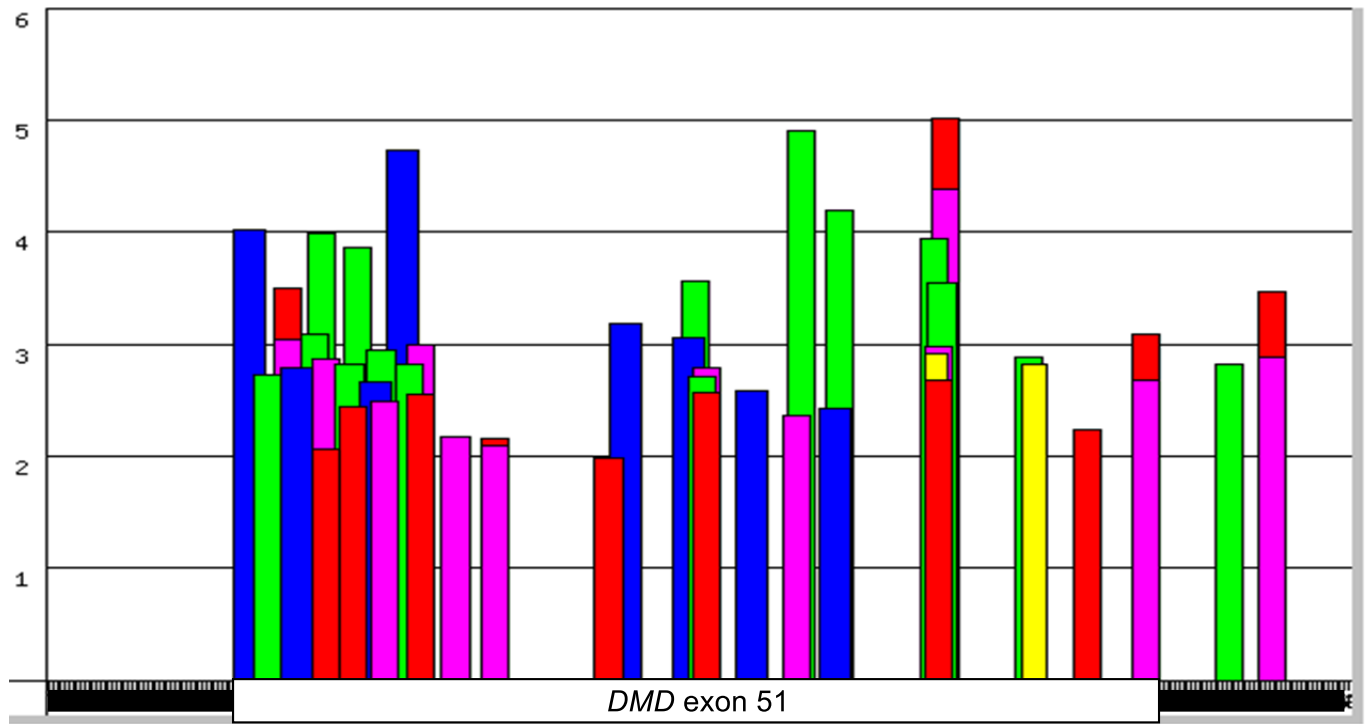

- SRSF1
- SRSF1 (IgM-BRCA1)
- SRSF2
- SRSF5
- SRSF6
