# Supplementary material for: Construction of a tri-chromatic reporter cell line for the rapid and simple screening of splice-switching oligonucleotides targeting DMD exon 51 using high content screening
Source: PubMed Central journal article supplement (PMC5955590; doi:10.1371/journal.pone.0197373), 2018-05-16
Supplement: pone.0197373.s006.pdf [file pone.0197373.s006.pdf]

**S1 Table. SSOs used for the assay.**

Twenty-one LNA-based SSOs, PRO-051, and AVI-4658 for dystrophin exon 51 skipping are shown. Sequences are shown from 5' to 3'. Capital letters with (L); LNA. Small letters: DNA. Capital letters with (M); 2'-OMe RNA. Capital letters with (P); PMO. ^; phosphorothioate backbone. For  $T_m$  analysis, SSOs and complementary native RNAs were diluted in 10 mM phosphate buffer (pH 7.2), 10 mM NaCl at 2  $\mu$ M. Values represent the mean  $\pm$  standard deviation of three independent experiments.

| Entry | Target                 | Sequence                                                                                                                                                                                                   | $T_m$ value ( $^{\circ}$ C) |
|-------|------------------------|------------------------------------------------------------------------------------------------------------------------------------------------------------------------------------------------------------|-----------------------------|
| 01    | DMD exon51<br>-20-8    | a <sup>^</sup> T(L) <sup>^</sup> t <sup>^</sup> T(L) <sup>^</sup> t <sup>^</sup> G(L) <sup>^</sup> g <sup>^</sup> G(L) <sup>^</sup> t <sup>^</sup><br>T(L) <sup>^</sup> t <sup>^</sup> T(L) <sup>^</sup> t | 55.1 $\pm$ 0.3              |
| 02    | DMD exon51<br>-7+6     | t <sup>^</sup> A(L) <sup>^</sup> g <sup>^</sup> G(L) <sup>^</sup> a <sup>^</sup> G(L) <sup>^</sup> c <sup>^</sup> T(L) <sup>^</sup> a <sup>^</sup><br>A(L) <sup>^</sup> a <sup>^</sup> A(L) <sup>^</sup> t | 54.0 $\pm$ 0.7              |
| 03    | DMD exon51<br>+7+19    | g <sup>^</sup> T(L) <sup>^</sup> a <sup>^</sup> A(L) <sup>^</sup> c <sup>^</sup> A(L) <sup>^</sup> g <sup>^</sup> T(L) <sup>^</sup> c <sup>^</sup><br>T(L) <sup>^</sup> g <sup>^</sup> A(L) <sup>^</sup> g | 64.6 $\pm$ 0.3              |
| 04    | DMD exon51<br>+20+32   | t <sup>^</sup> T(L) <sup>^</sup> g <sup>^</sup> T(L) <sup>^</sup> g <sup>^</sup> T(L) <sup>^</sup> c <sup>^</sup> A(L) <sup>^</sup> c <sup>^</sup><br>C(L) <sup>^</sup> a <sup>^</sup> G(L) <sup>^</sup> a | 70.0 $\pm$ 0.3              |
| 05    | DMD exon51<br>+33+45   | t <sup>^</sup> A(L) <sup>^</sup> g <sup>^</sup> T(L) <sup>^</sup> a <sup>^</sup> A(L) <sup>^</sup> c <sup>^</sup> C(L) <sup>^</sup> a <sup>^</sup><br>C(L) <sup>^</sup> a <sup>^</sup> G(L) <sup>^</sup> g | 66.7 $\pm$ 0.2              |
| 06    | DMD exon51<br>+46+58   | a <sup>^</sup> T(L) <sup>^</sup> g <sup>^</sup> G(L) <sup>^</sup> c <sup>^</sup> A(L) <sup>^</sup> g <sup>^</sup> T(L) <sup>^</sup> t <sup>^</sup><br>T(L) <sup>^</sup> c <sup>^</sup> C(L) <sup>^</sup> t | 70.3 $\pm$ 0.4              |
| 07    | DMD exon51<br>+59+71   | t <sup>^</sup> T(L) <sup>^</sup> c <sup>^</sup> T(L) <sup>^</sup> a <sup>^</sup> G(L) <sup>^</sup> t <sup>^</sup> T(L) <sup>^</sup> t <sup>^</sup><br>G(L) <sup>^</sup> g <sup>^</sup> A(L) <sup>^</sup> g | 62.3 $\pm$ 0.7              |
| 08    | DMD exon51<br>+72+84   | a <sup>^</sup> G(L) <sup>^</sup> g <sup>^</sup> A(L) <sup>^</sup> a <sup>^</sup> G(L) <sup>^</sup> a <sup>^</sup> T(L) <sup>^</sup> g <sup>^</sup><br>G(L) <sup>^</sup> c <sup>^</sup> A(L) <sup>^</sup> t | 67.7 $\pm$ 0.4              |
| 09    | DMD exon51<br>+85+97   | a <sup>^</sup> C(L) <sup>^</sup> c <sup>^</sup> T(L) <sup>^</sup> c <sup>^</sup> C(L) <sup>^</sup> a <sup>^</sup> A(L) <sup>^</sup> c <sup>^</sup><br>A(L) <sup>^</sup> t <sup>^</sup> C(L) <sup>^</sup> a | 68.5 $\pm$ 0.3              |
| 10    | DMD exon51<br>+98+110  | t <sup>^</sup> G(L) <sup>^</sup> c <sup>^</sup> C(L) <sup>^</sup> a <sup>^</sup> G(L) <sup>^</sup> a <sup>^</sup> G(L) <sup>^</sup> c <sup>^</sup><br>A(L) <sup>^</sup> g <sup>^</sup> G(L) <sup>^</sup> t | 77.9 $\pm$ 0.5              |
| 11    | DMD exon51<br>+111+123 | c <sup>^</sup> C(L) <sup>^</sup> c <sup>^</sup> G(L) <sup>^</sup> g <sup>^</sup> T(L) <sup>^</sup> t <sup>^</sup> G(L) <sup>^</sup> a <sup>^</sup><br>A(L) <sup>^</sup> a <sup>^</sup> T(L) <sup>^</sup> c | 66.1 $\pm$ 0.5              |
| 12    | DMD exon51<br>+124+136 | a <sup>^</sup> G(L) <sup>^</sup> t <sup>^</sup> T(L) <sup>^</sup> c <sup>^</sup> T(L) <sup>^</sup> g <sup>^</sup> T(L) <sup>^</sup> c <sup>^</sup><br>C(L) <sup>^</sup> a <sup>^</sup> A(L) <sup>^</sup> g | 69.4 $\pm$ 0.8              |
| 13    | DMD exon51<br>+137+149 | a <sup>^</sup> A(L) <sup>^</sup> g <sup>^</sup> C(L) <sup>^</sup> c <sup>^</sup> A(L) <sup>^</sup> g <sup>^</sup> T(L) <sup>^</sup> c <sup>^</sup><br>G(L) <sup>^</sup> g <sup>^</sup> T(L) <sup>^</sup> a | 74.8 $\pm$ 0.4              |

| Entry | Target                 | Sequence                                                                                                                             | $T_m$ value (°C) |
|-------|------------------------|--------------------------------------------------------------------------------------------------------------------------------------|------------------|
| 14    | DMD exon51<br>+150+162 | g^A(L)^t^C(L)^a^A(L)^g^C(L)^a^<br>G(L)^a^G(L)^a                                                                                      | 64.1 ± 0.6       |
| 15    | DMD exon51<br>+163+175 | g^A(L)^t^T(L)^t^T(L)^a^T(L)^a^<br>A(L)^c^T(L)^t                                                                                      | 42.7 ± 0.9       |
| 16    | DMD exon51<br>+176+188 | c^A(L)^t^C(L)^a^C(L)^c^C(L)^t^<br>C(L)^t^G(L)^t                                                                                      | 74.2 ± 0.8       |
| 17    | DMD exon51<br>+189+201 | c^A(L)^a^G(L)^g^T(L)^c^A(L)^c^<br>C(L)^c^A(L)^c                                                                                      | 73.7 ± 0.5       |
| 18    | DMD exon51<br>+202+214 | t^C(L)^g^T(L)^t^G(L)^a^T(L)^a^<br>T(L)^c^C(L)^t                                                                                      | 62.9 ± 0.5       |
| 19    | DMD exon51<br>+215+227 | c^T(L)^t^G(L)^a^T(L)^g^A(L)^t^<br>C(L)^a^T(L)^c                                                                                      | 55.0 ± 0.4       |
| 20    | DMD exon51<br>+228-7   | c^T(L)^c^A(L)^t^A(L)^c^C(L)^t^<br>T(L)^c^T(L)^g                                                                                      | 64.1 ± 0.2       |
| 21    | DMD exon51<br>-8-20    | t^T(L)^t^A(L)^t^C(L)^a^T(L)^t^<br>T(L)^t^T(L)^t                                                                                      | 41.7 ± 0.7       |
| 22    | PRO-051                | U(M)^C(M)^A(M)^A(M)^G(M)^G(M)^<br>A(M)^A(M)^G(M)^A(M)^U(M)^G(M)^<br>G(M)^C(M)^A(M)^U(M)^U(M)^U(M)^<br>C(M)^U(M)                      | -                |
| 23    | AVI-4658               | C(P)T(P)C(P)C(P)A(P)A(P)C(P)A(<br>P)T(P)C(P)A(P)A(P)G(P)G(P)A(P)<br>A(P)G(P)A(P)T(P)G(P)G(P)C(P)A(<br>P)T(P)T(P)T(P)C(P)T(P)A(P)G(P) | -                |
