# Supplementary material for: Construction of a tri-chromatic reporter cell line for the rapid and simple screening of splice-switching oligonucleotides targeting DMD exon 51 using high content screening
Source: PubMed Central journal article supplement (PMC5955590; doi:10.1371/journal.pone.0197373), 2018-05-16
Supplement: pone.0197373.s007.pdf [file pone.0197373.s007.pdf]

**S2 Table. Primers used for PCR analysis for tri-chromatic reporter cell line**

Sequences for the forward (For.) and reverse (Rev.) primers for each target are shown.

Sequences are shown from 5' to 3'.

| Gene                      | ID          | Sequence       | Size                                                  |
|---------------------------|-------------|----------------|-------------------------------------------------------|
| <i>DMD</i><br><i>gene</i> | <i>mini</i> | For.<br>primer | ACTTCAAGAGCTGAGGGCAA<br>637 bp<br>(exon 51 inclusion) |
|                           |             | Rev.<br>primer | CTTCATGTGGTCGGGGTAGC<br>404 bp<br>(exon 51 skipped)   |
| <i>cGAPDH</i>             |             | For.<br>primer | GGAAGGACTCATGACCACGG<br>584 bp                        |
|                           |             | Rev.<br>primer | TGGGGGTTATTGGACAGGGA                                  |
