# Supplementary material for: Construction of a tri-chromatic reporter cell line for the rapid and simple screening of splice-switching oligonucleotides targeting DMD exon 51 using high content screening
Source: PubMed Central journal article supplement (PMC5955590; doi:10.1371/journal.pone.0197373), 2018-05-16
Supplement: pone.0197373.s008.pdf [file pone.0197373.s008.pdf]

**S3 Table. Primers used for PCR analysis for RD cell line.**

Sequences for the forward (For.) and reverse (Rev.) primers for each target are shown.

Sequences are shown from 5' to 3'.

| Gene          | ID     | Sequence                  | Size                |
|---------------|--------|---------------------------|---------------------|
| <i>hDMD</i>   | For.   | GGACCATTTGACGTTAAGGAAAC   |                     |
| 1st PCR       | primer |                           |                     |
|               | Rev.   | AGGTCTTTGGCCAACTGCTTG     |                     |
|               | primer |                           |                     |
| <i>hDMD</i>   | For.   | CACTCAGCCAGTGAAGAGGA      | 497 bp              |
| 2nd PCR       | primer |                           | (exon 51 inclusion) |
|               | Rev.   | ACTGATTCTGAATTCTTTCAATTCG | 264 bp              |
|               | primer |                           | (exon 51 skipped)   |
| <i>hGAPDH</i> | For.   | ACCACAGTCCATGCCATCAC      | 452 bp              |
|               | primer |                           |                     |
|               | Rev.   | TCCACCACCCTGTTGCTGTA      |                     |
|               | primer |                           |                     |
