# Supplementary material for: Construction of a tri-chromatic reporter cell line for the rapid and simple screening of splice-switching oligonucleotides targeting DMD exon 51 using high content screening
Source: PubMed Central journal article supplement (PMC5955590; doi:10.1371/journal.pone.0197373), 2018-05-16
Supplement: pone.0197373.s009.pdf [file pone.0197373.s009.pdf]

**S4 Table. Primers used for quantitative PCR analysis for reporter cell line.**

Sequences for the forward (For.) and reverse (Rev.) primers for each target are shown.

Sequences are shown from 5' to 3'.

| Gene                 | ID          | Sequence             | Size                       |
|----------------------|-------------|----------------------|----------------------------|
| <i>DMD mini gene</i> | For. primer | ACCACTATTGGAGCCTGCAA | 78 bp<br>(exon 51 skipped) |
|                      | Rev. primer | TGGGCAGCGGTAATGAGTTC |                            |
| <i>cGAPDH</i>        | For. primer | GGTTGTCTCCTGCGACTTCA | 135 bp                     |
|                      | Rev. primer | ACCACTCTGTTGCTGTAGCC |                            |
