# Supplementary material for: Construction of a tri-chromatic reporter cell line for the rapid and simple screening of splice-switching oligonucleotides targeting DMD exon 51 using high content screening
Source: PubMed Central journal article supplement (PMC5955590; doi:10.1371/journal.pone.0197373), 2018-05-16
Supplement: pone.0197373.s010.pdf [file pone.0197373.s010.pdf]

**S5 Table. A number of transcripts that contain sequence complementary to SSOs.**

To investigate the number of transcripts that contain a fully matched sequence to the target SSO sequences, we used GGRNA, a Google-like fast search engine for genes and transcripts (<http://GGRNA.dbcls.jp/>) [47]. In this analysis, splicing variants with the same gene ID were considered as one gene and the number of transcripts of the DMD gene was excluded.

| Entry | ID                 | Length of SSO | No. of transcripts containing the target sequence |
|-------|--------------------|---------------|---------------------------------------------------|
| 02    | DMD exon51-7+6     | 13            | 3                                                 |
| 08    | DMD exon51+72+84   | 13            | 8                                                 |
| 11    | DMD exon51+111+123 | 13            | 0                                                 |
| 12    | DMD exon51+124+136 | 13            | 4                                                 |
| 14    | DMD exon51+150+162 | 13            | 0                                                 |
| 20    | DMD exon51+228-7   | 13            | 2                                                 |
| 22    | PRO-051            | 20            | 0                                                 |
| 23    | AVI-4658           | 30            | 0                                                 |
